# Supplementary material for: Occurrence and removal of titanium at full scale wastewater treatment plants: implications for TiO2 nanomaterials
Source: Royal Society of Chemistry journal article supplement (doi:10.1039/c1em10017c), 2011-01-01
Supplement: c1em10017c.pdf [file c1em10017c.pdf]

## Supplemental Information

**Table S.1 – Sample identification and bulk water quality characteristics from 10 WWTPs**

| Facility ID # | Bulk water quality of wastewater effluents |                  |                  |                      |                        |                        |
|---------------|--------------------------------------------|------------------|------------------|----------------------|------------------------|------------------------|
|               | COD<br>mg/L as O <sub>2</sub>              | DOC<br>mg/L as C | TDN<br>mg/L as N | Ammonia<br>mg/L as N | Nitrate-N<br>mg/L as N | Nitrite-N<br>mg/L as N |
| 1             | 19                                         | 6.7              | 3.0              | 0.1                  | 2.9                    | 0.1                    |
| 2             | 9                                          | 8.6              | 5.9              | <0.1                 | 5.3                    | <0.1                   |
| 3             | 19                                         | 8.6              | 4.8              | 1.5                  | 1.7                    | 0.4                    |
| 4             | 16                                         | 8.0              | 5.6              | 0.3                  | 4.1                    | 0.1                    |
| 5             | 18                                         | 7.3              | 15.5             | 1.0                  | 11.6                   | 0.4                    |
| 6             | 40                                         | 10.7             | 36.7             | 20.6                 | 9.3                    | 12.8                   |
| 7             | 34                                         | 8.6              | 3.4              | 0.2                  | 3.1                    | 0.1                    |
| 8             | 29                                         | 9.8              | 34.3             | 25.6                 | 3.6                    | 0.6                    |
| 9             | 18                                         | 7.2              | 5.2              | 0.4                  | 3.9                    | 0.1                    |
| 10            | 21                                         | 6.7              | 4.8              | 1.3                  | 4.1                    | 0.1                    |

**Table SI-2 Analysis of HCl-colloids and HCl-HF colloids**

| Facility ID # | HCl-colloids     |            |            |       | HCl-HF colloids  |            |            |       |
|---------------|------------------|------------|------------|-------|------------------|------------|------------|-------|
|               | Isolated mass mg | Yield mg/L | Moisture % | Ash % | Isolated mass mg | Yield mg/L | Moisture % | Ash % |
| 1             | 354.5            | 15.3       | 6.3        | 73.3  | 50.0             | 2.2        | 5.4        | 13.5  |
| 2             | 655.3            | 24.9       | 5.0        | 89.2  | 30.6             | 1.2        | 7.3        | 5.2   |
| 3             | 669.1            | 26.6       | 36.7       | 50.6  | 54.1             | 2.2        | 5.4        | 10.8  |
| 4             | 620.0            | 23.0       | 10.1       | 66.9  | 103.6            | 3.8        | 4.0        | 36.4  |
| 5             | 862.1            | 34.4       | 1.9        | 76.1  | 229.1            | 9.1        | 4.2        | 22.8  |
| 6             | 1522.2           | 57.4       | 6.2        | 65.5  | 286.4            | 10.8       | 3.3        | 33.8  |
| 7             | 2547.5           | 79.6       | 12.8       | 78.8  | 744.5            | 23.3       | 2.7        | 80.1  |
| 8             | 1364.1           | 51.1       | 4.5        | 77.5  | 299.6            | 11.2       | 2.9        | 29.8  |
| 9             | 291.7            | 11.4       | 3.4        | 82.2  | 24.6             | 1.0        | 19.4       | 0.0   |
| 10            | 433.2            | 14.0       | 12.3       | 79.9  | 24.3             | 0.8        | 7.6        | 31.8  |
